# Supplementary material for: Genome-wide screening identifies new genes required for stress-induced phase 2 detoxification gene expression in animals
Source: PubMed Central journal article supplement (PMC4160539; doi:10.1186/s12915-014-0064-6), 2014-08-14
Supplement: 12915_2014_64_MOESM1_ESM.pdf [file 12915_2014_64_MOESM1_ESM.pdf]

**Table S1 Genes required for growth, development or reproduction in the absence of *prdx-2*.** 70  
RNAi clones that resulted in lethal, sterile or reduced brood size phenotypes in the *prdx-2* mutant but had not previously been reported to result in these phenotypes in wild-type animals [1,2].

| RNAi clone  | Phenotype          | function          | Gene name                                                               |
|-------------|--------------------|-------------------|-------------------------------------------------------------------------|
| Y54G11A.5   | sterile and lethal | stress defences   | <i>ctl-2</i> , catalase                                                 |
| Y54G11A.6   | sterile and lethal | stress defences   | <i>ctl-1</i> , catalase                                                 |
| R07E5.2     | sterile and lethal | stress defences   | <i>prdx-3</i> , peroxiredoxin-3                                         |
| W01A11.4    | sterile and lethal | stress defences   | <i>lec-10</i> , galectin                                                |
| K04A8.8     | sterile and lethal | stress defences   | <i>spp-20</i> , saposin-like family                                     |
| T07E3.4     | sterile and lethal | signaling         | F-box containing protein                                                |
| Y71D11A.b   | sterile and lethal | signaling         | <i>fbxa-78</i> , F box A protein                                        |
| F44D12.6    | sterile and lethal | unknown function  |                                                                         |
| Y60A9.1     | lethal             | unknown function  |                                                                         |
| C47E8.3     | lethal             | unknown function  |                                                                         |
| K12B6.2     | lethal             | unknown function  | uncharacterised conserved protein                                       |
| F41E7.8     | sterile            | Stress defences   | <i>cnc-8</i> caenacin peptide                                           |
| H15N14.1    | sterile            | RNA processing    | <i>adr-1</i> , tRNA-specific adenosine deaminase                        |
| F36A2.1     | sterile            | RNA processing    | <i>cids-2</i> , contains a CTD of RNA Pol II-interacting domain         |
| F13H8.2     | sterile            | RNA processing    | subunit of 18S rRNA processing complex                                  |
| F14B4.2     | sterile            | metabolism        | hexokinase                                                              |
| W04G3.5     | sterile            | metabolism        | phosphoribosylpyrophosphate synthetase-associated protein               |
| C54D2.4     | sterile            | metabolism        | <i>sul-3</i> , orthologous to the human gene ARYLSULFATASE B            |
| Y110A2AL.12 | sterile            | membrane proteins | uncharacterised membrane protein                                        |
| C49D10.3    | sterile            | membrane proteins | <i>srh-250</i> , serpentine receptor class H                            |
| Y57A10C.5   | sterile            | membrane proteins | <i>sre-25</i> , serpentine receptor class E                             |
| D1009.2     | sterile            | other             | <i>cyn-8</i> , peptidyl-propyl cis-trans isomerase (cyclophilin family) |
| C36B7.7     | sterile            | signaling         | <i>hen-1</i> , secreted protein with LDL receptor motif A               |
| T20F7.3     | sterile            | signaling         | Inositol polyphosphate multikinase                                      |
| R03G5.5     | sterile            | unknown function  |                                                                         |
| F08F1.4     | sterile            | unknown function  |                                                                         |
| F47B10.4    | sterile            | unknown function  |                                                                         |
| Y62H9A.3    | sterile            | unknown function  | unnamed protein                                                         |
| H38K22.4    | sterile            | unknown function  |                                                                         |
| Y110A2AM.1  | sterile            | unknown function  |                                                                         |
| Y17G7B.19   | sterile            | unknown function  |                                                                         |
| C17G10.7    | sterile            | unknown function  | unnamed gene                                                            |
| C02B4.3     | sterile            | unknown function  |                                                                         |
| Y110A2AL.9  | embryonic lethal   | unknown function  |                                                                         |
| F46G10.1    | embryonic lethal   | unknown function  |                                                                         |
| F18G5.1     | embryonic lethal   | unknown function  |                                                                         |
| F08G2.7     | embryonic lethal   | unknown function  | unnamed gene                                                            |
| Y46G5.x     | embryonic lethal   | metabolism        | <i>acl-7</i> , Acyl-CoA:DHA-phosphate acyltransferase (DHAPAT)          |
| C05D11.13   | embryonic lethal   | gene expression   | Zn-finger protein and coiled-coil protein                               |
| F57G9.2     | embryonic lethal   | membrane proteins | <i>sre-30</i> , serpentine receptor class E                             |
| T26A5.1     | embryonic lethal   | membrane proteins | <i>wht-6</i> , ABC transporter                                          |
| T28C12.3    | sick               | signaling         | <i>fbxa-202</i> , f-box containing protein                              |
| K07G5.3     | reduced brood size | signaling         | C2 Ca <sup>2+</sup> -binding motif-containing protein                   |
| F41D9.1     | reduced brood size | signaling         | <i>tbc-18</i> (Tre-2/Bub2/Cdc16 domain family) predicted GAP            |
| C29F7.4     | reduced brood size | gene expression   | <i>fbk-3</i> , forkhead transcription factor                            |
| Y51H1A.5    | reduced brood size | gene expression   | <i>hda-6</i> , class II histone deacetylase                             |
| F56D2.4     | reduced brood size | other             | <i>uev-2</i> , ubiquitin-conjugating enzyme (UBC or E2) variant         |
| F37B1.7     | reduced brood size | Stress defences   | <i>gst-18</i> , glutathione S transferase                               |
| F35D11.8    | reduced brood size | Stress defences   | <i>clcc-137</i> , c-type lectin                                         |

|                      |                    |                   |                                                                          |
|----------------------|--------------------|-------------------|--------------------------------------------------------------------------|
| <i>C49D10.2</i>      | reduced brood size | gene expression   | <i>nhr-166</i> , nuclear hormone receptor                                |
| <i>F47C10.1</i>      | reduced brood size | gene expression   | <i>nhr-185</i> , nuclear hormone receptor                                |
| <i>Y102E9.1</i>      | reduced brood size | membrane proteins | <i>odr-4</i> , transmembrane protein needed for odorant response         |
| <i>R11G10.1</i>      | reduced brood size | membrane proteins | <i>avr-15</i> , glutamate-gated chloride channel subunit homologs        |
| <i>Y97E10A_263.b</i> | reduced brood size | membrane proteins | <i>ncx-10</i> , putative Na <sup>[+]</sup> /Ca <sup>[2+]</sup> exchanger |
| <i>F44F4.6</i>       | reduced brood size | metabolism        | <i>gly-1</i> , transmembrane glycosyltransferase                         |
| <i>F47G4.7</i>       | reduced brood size | metabolism        | <i>smd-1</i> , S-adenosylmethionine decarboxylase                        |
| <i>Y102A5C.1</i>     | reduced brood size | signaling         | <i>fbxa-206</i> , protein containing an F box                            |
| <i>F56C9.10</i>      | reduced brood size | signaling         | WD40 repeat containing protein                                           |
| <i>C35E7.9</i>       | reduced brood size | unknown function  | uncharacterized, contains major sperm protein(MSP) domain                |
| <i>F53E10.1</i>      | reduced brood size | unknown function  | uncharacterised Fe-S protein                                             |
| <i>T08A9.5</i>       | reduced brood size | unknown function  |                                                                          |
| <i>R06C7.6</i>       | reduced brood size | unknown function  | uncharacterised conserved protein                                        |
| <i>F54D10.7</i>      | reduced brood size | unknown function  |                                                                          |
| <i>B0284.2</i>       | reduced brood size | unknown function  | uncharacterised protein                                                  |
| <i>F49C5.7</i>       | reduced brood size | unknown function  |                                                                          |
| <i>F38H4.3</i>       | reduced brood size | unknown function  |                                                                          |
| <i>Y57G11A.2</i>     | reduced brood size | unknown function  | uncharacterised protein                                                  |
| <i>F02C9.2</i>       | reduced brood size | unknown function  | uncharacterised conserved protein                                        |
| <i>F32D8.8</i>       | reduced brood size | unknown function  |                                                                          |
| <i>T22E5.1</i>       | reduced brood size | unknown function  |                                                                          |

1. Kamath RS, Fraser AG, Dong Y, Poulin G, Durbin R, et al. (2003) Systematic functional analysis of the *Caenorhabditis elegans* genome using RNAi. *Nature* 421: 231-237.
2. Rual JF, Ceron J, Koreth J, Hao T, Nicot AS, et al. (2004) Toward improving *Caenorhabditis elegans* phenome mapping with an ORFeome-based RNAi library. *Genome Res* 14: 2162-2168.

**Table S2. RNAi clones that increased intestinal *gcs-1p::gfp* expression in *prdx-2* mutant** 50 clones which resulted in high levels of nuclear GFP throughout the intestine (as illustrated in Fig.1) of at least 50% of the RNAi-treated *prdx-2 gcs-1p::gfp* worms are listed. Description of the predicted function and potential human homolog of each gene, are shown. ‘nematodes only’ indicates that no homologs identified outside *Caenorhabditis briggsae*, *Caenorhabditis brenneri*, *Caenorhabditis remanei*, *Caenorhabditis japonica* or *Pristionchus pacificus*.

| RNAi clone    | Human Homolog  | Description                                                                                            |
|---------------|----------------|--------------------------------------------------------------------------------------------------------|
| T12F5.4       | none           | putative transcription factor ASH1/LIN-59                                                              |
| T03F1.1       | UBA5           | molybdopterin biosynthesis-related protein                                                             |
| T03F1.8       | GUK1           | guanylate kinase                                                                                       |
| E01A2.i       | GCLM           | glutamate-cysteine ligase regulatory subunit                                                           |
| D2030.9       | DCAF11         | <i>wdr-23</i> , WD40 repeat containing protein                                                         |
| T28B8.5       | SCNN1A         | <i>del-4</i> , Non voltage-gated ion channels (DEG/ENaC family)                                        |
| T19A6.3       | TMEM188        | uncharacterised conserved protein                                                                      |
| Y106G6H.10    | none           |                                                                                                        |
| C34B2.4       | LMO4           | adaptor protein Enigma and related PDZ-LIM proteins                                                    |
| Y47H9C.12     | none           | uncharacterised protein                                                                                |
| W02D9.3       | HMG20B, HMG20A | HMG-box containing protein                                                                             |
| T06G6.9       | VBP1           | <i>pfd-3</i> , putative molecular chaperone prefoldin                                                  |
| F44F1.6       | nematodes only | uncharacterised coiled-coil containing protein                                                         |
| T02H6.8       | none           | unnamed protein                                                                                        |
| Y50F7A.1      | RAP1GAP2       | merged into F53A10.2, Rap1GAP homolog                                                                  |
| F59H6.3       | none           | unnamed protein                                                                                        |
| C08B11.6      | ACTR6          | actin-related protein                                                                                  |
| M176.2        | GSS            | glutathione synthetase                                                                                 |
| ZC47.13       | nematodes only | <i>fbxa-50</i> , contains an F-box and FTH/DUF38 motif, which may mediate protein-protein interactions |
| C38D4.7       | nematodes only |                                                                                                        |
| F10E9.1       | nematodes only |                                                                                                        |
| ZC262.4       | none           |                                                                                                        |
| R05D3.11      | SETDB2         | <i>met-2</i> , histone methyltransferase                                                               |
| F54F2.2       | MLLT10         | <i>zfp-1</i> , leucine zipper, zinc finger, and PHD/LAP domain-containing protein                      |
| K03H1.5       | SUSD2          | mucin/alpha tectorin                                                                                   |
| Y53G8A_9248.c | NDUFA9         | <i>Y53G8AL.2</i> , NADH:ubiquinone oxidoreductase                                                      |
| T20D3.1       | nematodes only | <i>clcc-183</i> , c-type lectin                                                                        |
| F36H1.4       | nematodes only | <i>lin-3</i> , member of the EGF family of peptide growth factors                                      |
| B0035.11      | LEO1           | uncharacterised conserved protein                                                                      |

|                     |                                      |                                                                                                      |
|---------------------|--------------------------------------|------------------------------------------------------------------------------------------------------|
| <i>C26C9.2</i>      | none                                 | Merged into T06A10.2                                                                                 |
| <i>F26D10.1</i>     | CD69, CLEC4A, CLEC5A, CLEC4D, CLEC6A | <i>clec-87</i> putatively secreted C-type lectin, paralogous to CLEC-88, C25B8.4, F26D10.12, ZK858.3 |
| <i>F26D10.2</i>     | ACACA                                | T28F3.5                                                                                              |
| <i>Y37E11A_94.e</i> | nematodes only                       | Y37E11AL.6 predicted secreted protein, two cadherin domains and a C-terminal EGF-like domain         |
| <i>Y9C9A_54.a</i>   | SQRDL                                | targets Y9C9A.16, 21ur-2020, 21ur-11733, 21ur-9201                                                   |
| <i>F49F1.1</i>      | none                                 | secreted surface protein                                                                             |
| <i>R08C7.1</i>      | none                                 |                                                                                                      |
| <i>H24K24.a</i>     | ADH5                                 | targets H24K24.3 alcohol dehydrogenase class III and Y50D4C.2 alcohol dehydrogenase type III         |
| <i>ZK697.6</i>      | GSTA3 and others                     | <i>gst-21</i> , glutathione s transferase                                                            |
| <i>ZK697.11</i>     | nematodes only                       | <i>srh-199</i> , serpentine receptor class H                                                         |
| <i>W02H5.a</i>      | DAK                                  | W02H5.8, Dihydroxyacetone kinase/glycerone kinase                                                    |
| <i>C46A5.6</i>      | nematodes only                       |                                                                                                      |
| <i>C55A1.10</i>     | none                                 | <i>srh-168</i> , serpentine receptor class H                                                         |
| <i>F54B8.5</i>      | nematodes only                       | <i>abf-3</i> , may play a role in innate immunity from sequence similarity                           |
| <i>F53B1.4</i>      | TGDS                                 | putative NAD <sup>+</sup> -dependent epimerases                                                      |
| <i>H03G16.4</i>     | nematodes only                       | <i>fbxa-96</i> , f box A protein                                                                     |
| <i>H03G16.5</i>     | none                                 |                                                                                                      |
| <i>K09E9.1</i>      | none                                 | synaptic vesicle transporter SVOP and related transporters (major facilitator superfamily)           |
| <i>T27A8.3</i>      | METAP2                               | metallopeptidase                                                                                     |
| <i>Y13C8A.a</i>     | none                                 | targets F46C3.7 and Y13C8A.1, uncharacterised protein                                                |
| <i>B0302.4</i>      | none                                 |                                                                                                      |

**Table S3. RNAi clones which reduced intestinal *gcs-1p::gfp* expression in genome-wide RNAi screen in *prdx-2* mutant and their effect on the expression of a non-phase 2 intestinally expressed gene reporter *F09E5.3::gfp* and a second phase 2 reporter gene *gst-4p::gfp* in wild-type (N2) animals under normal growth conditions.** Each RNAi clone reduced intestinal *gcs-1p::gfp* to undetectable levels (Fig.1) in at least 50% of the RNAi-treated animals but none were observed to prevent pharyngeal expression of *gcs-1p::gfp*. The 355 RNAi clones are listed according to the number of times they reduced *gcs-1p::gfp* out of the 4 times in which they were screened. RNAi clones which affected intestinal *F09E5.3::gfp* (33) or *gst-4p::gfp* (19) expression on at least 2 out of 3 occasions on which they were scored are indicated. Human homologs are indicated where known. Gene descriptions were derived from WormBase.

| RNAi clone | Reduced <i>gcs-1p::gfp</i> | Effect on <i>F09E5.3::gfp</i> | Effect on <i>gst4p::gfp</i> | Human homolog     | Gene description                                                                                                       |
|------------|----------------------------|-------------------------------|-----------------------------|-------------------|------------------------------------------------------------------------------------------------------------------------|
| C26C6.1    | 4/4                        | decreased                     | decreased                   | PBRM1             | <i>pbrm-1</i> , interacts with two or more components of the EGF/RAS signalling pathway                                |
| R134.2     | 4/4                        | -                             | -                           | GUCY/NPR1/2       | <i>gcy-2</i> , natriuretic peptide receptor predicted to function in chemosensory signal transduction                  |
| AH6.1      | 4/4                        | -                             | -                           | GUCY/NPR1/2       | <i>gcy-1</i> , natriuretic peptide receptor, guanylate cyclase                                                         |
| K04D7.1    | 4/4                        | decreased                     | decreased                   | GNB2L             | <i>rack-1</i> , G protein beta subunit-like protein                                                                    |
| F13B10.1   | 4/4                        | -                             | -                           | SARM1             | <i>tir-1</i> , TIR (Toll and Interleukin 1 Receptor) domain protein                                                    |
| R12B2.1    | 4/4                        | -                             | -                           | SMAD              | <i>sma-4</i> , TGFbeta receptor signaling protein SMAD                                                                 |
| C06E8.1    | 4/4                        | decreased                     | decreased                   | GLRA              | targets F11H8.2 ( <i>lgc-38</i> ), an UNC-49-like GABA receptor subunit                                                |
| F57F5.5    | 4/4                        | -                             | -                           | PRKC, RBPMS       | sequencing indicates clone may target multiple genes including <i>mec-8</i> and <i>pkc-1</i>                           |
| F47A4.2    | 4/4                        | -                             | -                           | MED12L, MED12     | <i>dpy-22</i> , homologous to the transcriptional mediator protein TRAP230, which is involved in WNT and RAS signaling |
| C16A3.8    | 4/4                        | -                             | -                           | THOC2             | <i>thoc-2</i> , THO complex (transcription factor/nuclear export) subunit                                              |
| C28H8.3    | 4/4                        | -                             | -                           | Q96ND6            | predicted helicase, DEAD-box superfamily                                                                               |
| W01B6.9    | 4/4                        | -                             | -                           | COG-7             | <i>ndc-80</i> , Centromere-associated protein HEC1                                                                     |
| D2096.8    | 4/4                        | decreased                     | -                           | NAP1L             | related to NAP (Nucleosome Assembly Protein) family of proteins involved in chromatin remodeling                       |
| T26A8.4    | 4/4                        | -                             | -                           | ZC3H4/6           | component of the conserved Ccr4-Not deadenylase complex that regulates transcription and RNA degradation               |
| C17G10.1   | 4/4                        | -                             | -                           | OGFOD1            | Predicted component of NuA3 histone acetyltransferase complex                                                          |
| B0286.4    | 4/4                        | decreased                     | decreased                   | CNOT2             | <i>ntl-2</i> , predicted transcriptional regulator                                                                     |
| E01A2.f    | 4/4                        | -                             | -                           | NKAPL, NKAP       | E01A2.4 NFKB activating protein homolog                                                                                |
| B0025.2    | 4/4                        | -                             | increased                   | COPS2             | <i>csn-2</i> , COP9 signalosome subunit CSN2                                                                           |
| T05H10.5   | 4/4                        | -                             | decreased                   | UBE4A/UBE4B       | <i>ufd-2</i> , ubiquitin fusion degradation protein-2                                                                  |
| Y102A5A.1  | 4/4                        | -                             | -                           | CAND1/CAND2       | <i>cand-1</i> , TATA-binding protein-interacting protein                                                               |
| F08B12.2   | 4/4                        | -                             | -                           | PEX12             | <i>prx-12</i> , Predicted E3 ubiquitin ligase involved in peroxisome organization                                      |
| F27D4.1    | 4/4                        | -                             | -                           | ETFA              | electron transfer flavoprotein                                                                                         |
| Y49E10.4   | 4/4                        | -                             | -                           | PDIA6             | thioredoxin/protein disulphide isomerase                                                                               |
| D2023.1    | 4/4                        | decreased                     | -                           | CYPB5A/CYPB5B     | cytochrome B5                                                                                                          |
| K05D4.4    | 4/4                        | decreased                     | -                           | several eg CYP2A6 | <i>cyp-33D1</i> , Cytochrome P450 CYP2 subfamily                                                                       |
| M60.1      | 4/4                        | -                             | -                           | PP11              | targets M60.2, placental protein 11                                                                                    |
| D2013.10   | 4/4                        | -                             | -                           | TMEM41B           | <i>tag-175</i> , functionally uncharacterised, predicted membrane protein                                              |
| B0416.5    | 4/4                        | -                             | -                           | MFS7              | permease of the major facilitator superfamily                                                                          |
| F20H11.3   | 4/4                        | -                             | -                           | MDH2              | <i>mdh-1</i> , homolog of malate dehydrogenase that is predicted to be mitochondrial                                   |
| C34F11.3   | 4/4                        | -                             | -                           | AMPD1             | adenosine monophosphate deaminase                                                                                      |
| C06A8.1    | 4/4                        | -                             | -                           | MTHFR             | orthologous to human MSH HOMEODOMAIN HOMOLOG 1 (MTHFR) mutated in homocystinuria                                       |

|                     |     |           |           |                 |                                                                                                                           |
|---------------------|-----|-----------|-----------|-----------------|---------------------------------------------------------------------------------------------------------------------------|
| <i>F32B6.2</i>      | 4/4 | -         | -         | MCCC1           | ortholog of human ALPHA METHYLCROTONOYL-COENZYME A CARBOXYLASE 1                                                          |
| <i>T12A2.1</i>      | 4/4 | -         | -         | AMDHD1          | atrazine chlorohydrolase/guanine deaminase                                                                                |
| <i>F41H10.7</i>     | 4/4 | -         | -         | ELOVL3/6        | <i>elo-5</i> , polyunsaturated fatty acid (PUFA) elongase                                                                 |
| <i>Y57A10C.6</i>    | 4/4 | decreased | decreased | SCP2            | <i>daf-22</i> , catalyzes the final step in peroxisomal fatty acid beta-oxidation                                         |
| <i>F21H12.4</i>     | 4/4 | decreased | decreased | PTCH2           | <i>ptc-2</i> , sterol-sensing domain protein                                                                              |
| <i>E04F6.3</i>      | 4/4 | -         | -         | HSD17B4         | <i>maoc-1</i> , peroxisomal multifunctional beta-oxidation protein                                                        |
| <i>C44B11.3</i>     | 4/4 | -         | -         | TUBA1/TUBA4     | <i>mec-12</i> , alpha-tubulin required for normal mechanosensory response to gentle touch                                 |
| <i>ZK617.1</i>      | 4/4 | -         | -         | OBSL1, OBSCN    | <i>unc-22</i> encodes twitchin                                                                                            |
| <i>D1046.1</i>      | 4/4 | -         | -         | CPSF6           | <i>cim-2</i> , mRNA cleavage factor I subunit/CPSF subunit                                                                |
| <i>F32B6.3</i>      | 4/4 | decreased | -         | PRPF18          | U5 snRNP-associated RNA splicing factor                                                                                   |
| <i>Y116A8C.32</i>   | 4/4 | -         | -         | SF1             | <i>sfa-1</i> , Splicing factor 1/branch point binding protein (RRM superfamily)                                           |
| <i>K02F3.11</i>     | 4/4 | -         | -         | RNPS1           | <i>rnp-5</i> , splicing factor                                                                                            |
| <i>C16A3.3</i>      | 4/4 | -         | -         | PDCD11          | <i>let-716</i> , rRNA processing protein Rrp5                                                                             |
| <i>R11A5.1</i>      | 4/4 | -         | -         | AP3B1/AP3B2     | <i>apb-3</i> , adaptin predicted to be involved in formation of intracellular transport vesicles                          |
| <i>Y119D3_445.b</i> | 4/4 | -         | -         | PCDH            | <i>cdh-12</i> , cadherin, predicted to function in cell adhesion                                                          |
| <i>M01E11.7</i>     | 4/4 | -         | -         | TNS1/3/4, TENC1 | <i>tag-163</i> , Focal adhesion protein Tensin                                                                            |
| <i>K04G7.12</i>     | 4/4 | -         | -         | SYF2            | targets K04G7.11                                                                                                          |
| <i>C18F10.5</i>     | 4/4 | -         | -         | nematodes only  | <i>srg-2</i> , serpentine receptor class G                                                                                |
| <i>Y111B2B.b</i>    | 4/4 | -         | -         | nematodes only  | targets ZC482.2, predicted receptor. Secondary target Y69A2AR.11                                                          |
| <i>C45H4.1</i>      | 4/4 | -         | -         | nematodes only  | <i>srbc-16</i> , serpentine receptor class BC.                                                                            |
| <i>T27B7.1</i>      | 4/4 | -         | -         | nematodes only  | <i>nhr-59</i> , nuclear hormone receptor                                                                                  |
| <i>F46E10.11</i>    | 4/4 | -         | -         | nematodes only  | <i>hpo-26</i> , fibrillins and related proteins containing Ca <sup>2+</sup> -binding EGF-like domains                     |
| <i>C47G2.1</i>      | 4/4 | -         | -         | nematodes only  | <i>cut-1</i> , cuticulin precursor                                                                                        |
| <i>T28H11.2</i>     | 4/4 | -         | -         | nematodes only  | <i>srm-1</i> , serpentine receptor class m                                                                                |
| <i>C29E6.1</i>      | 4/4 | -         | -         | nematodes only  | <i>let-653</i> , mucin-like protein similar to the highly glycosylated mucins secreted by the apical surface of epithelia |
| <i>M01G12.4</i>     | 4/4 | -         | -         | nematodes only  | <i>srw-111</i> , serpentine receptor class W                                                                              |
| <i>T06G6.1</i>      | 4/4 | -         | -         | nematodes only  | <i>sra-23</i> , serpentine receptor, class a                                                                              |
| <i>T10B9.1</i>      | 4/4 | -         | -         | nematodes only  | <i>cyp-13A4</i> , Cytochrome P450 CYP3/CYP5/CYP6/CYP9 subfamilies                                                         |
| <i>T18H9.1</i>      | 4/4 | -         | decreased | nematodes only  | <i>grd-6</i> contains a C-terminal Ground domain                                                                          |
| <i>C35C5.1</i>      | 4/4 | -         | decreased |                 | <i>sdc-2</i> , represses transcription of X chromosomes to achieve dosage compensation                                    |
| <i>Y105C5A.n</i>    | 4/4 | -         | -         | nematodes only  | targets M199.8 and Y105C5A.26                                                                                             |
| <i>F22F7.4</i>      | 4/4 | -         | -         | nematodes only  | extracellular protein with conserved cysteines                                                                            |
| <i>T12A2.5</i>      | 4/4 | -         | -         | nematodes only  |                                                                                                                           |
| <i>F46F11.6</i>     | 4/4 | decreased | -         | nematodes only  |                                                                                                                           |
| <i>W01A8.5</i>      | 4/4 | -         | -         | nematodes only  |                                                                                                                           |
| <i>F59A6.2</i>      | 4/4 | -         | -         | nematodes only  |                                                                                                                           |
| <i>R148.2</i>       | 4/4 | -         | -         | nematodes only  |                                                                                                                           |
| <i>B0244.4</i>      | 4/4 | -         | -         | nematodes only  |                                                                                                                           |
| <i>Y75B8A.33</i>    | 4/4 | -         | -         | nematodes only  |                                                                                                                           |
| <i>T12D8.5</i>      | 4/4 | -         | -         | nematodes only  |                                                                                                                           |
| <i>F21F8.5</i>      | 4/4 | -         | -         | nematodes only  |                                                                                                                           |
| <i>F25B3.4</i>      | 4/4 | -         | -         | nematodes only  |                                                                                                                           |

|               |     |           |           |                      |                                                                                                                             |
|---------------|-----|-----------|-----------|----------------------|-----------------------------------------------------------------------------------------------------------------------------|
| R13H4.7       | 4/4 | -         | -         | nematodes only       |                                                                                                                             |
| F08G12.5      | 4/4 | -         | -         | nematodes only       |                                                                                                                             |
| D1053.4       | 4/4 | -         | -         | nematodes only       |                                                                                                                             |
| F54C1.3       | 4/4 | decreased | -         |                      | <i>mes-3</i> , member of polycomb-like chromatin repressive complex                                                         |
| C05D11.1      | 4/4 | -         | -         |                      | predicted Zn <sup>2+</sup> -dependent endopeptidase, insulinase superfamily                                                 |
| ZK792.3       | 4/4 | -         | -         |                      | <i>inx-9</i> encodes an integral transmembrane channel protein that is a structural component of invertebrate gap junctions |
| F58B6.1       | 4/4 | -         | -         |                      |                                                                                                                             |
| T26A5.2       | 4/4 | -         | -         |                      |                                                                                                                             |
| T19B10.2      | 4/4 | -         | -         |                      |                                                                                                                             |
| C44B9.2       | 4/4 | -         | -         |                      |                                                                                                                             |
| Y111B2C.a     | 4/4 | -         | -         |                      | targets Y111B2A.4, and Y41D4B.15                                                                                            |
| C18F10.2      | 4/4 | -         | -         |                      | uncharacterized protein, contains major sperm protein (MSP) domain                                                          |
| C24A11.2      | 4/4 | -         | -         |                      |                                                                                                                             |
| W02D9.8       | 4/4 | -         | -         |                      |                                                                                                                             |
| F49E12.7      | 4/4 | -         | -         |                      |                                                                                                                             |
| C50E3.8       | 4/4 | -         | -         |                      |                                                                                                                             |
| F35B3.3       | 4/4 | -         | -         |                      |                                                                                                                             |
| F07C3.4       | 3/4 | -         | -         | RCBTB1/2             | <i>glo-4</i> , guanine nucleotide exchange factor required for biogenesis of the lysosome-related gut granules              |
| F31F4.5       | 3/4 | -         | -         | several              | targets Y4C6A.1, protein tyrosine kinase                                                                                    |
| W09C5.7       | 3/4 | -         | -         | SACM1L               | phosphoinositide phosphatase SAC1                                                                                           |
| T13F2.3       | 3/4 | -         | -         | PAXIP1               | <i>pis-1</i> , ortholog of mammalian Pax transcription activation domain interacting protein PTIP                           |
| T16H12.4      | 3/4 | -         | decreased | GTF2H2               | RNA polymerase II transcription initiation/nucleotide excision repair factor TFIIH, subunit SSL1                            |
| H22K11.1      | 3/4 | decreased | -         | CTSD, NAPSA, REN,PGC | <i>asp-3</i> , aspartyl protease , also homologous to CTSE                                                                  |
| C26B2.6       | 3/4 | -         | -         | ELP4                 | <i>elpc-4</i> , RNA polymerase II elongator complex protein component                                                       |
| C28H8.11      | 3/4 | -         | -         | TDO2                 | tryptophan 2,3-dioxygenase                                                                                                  |
| T23B12.7      | 3/4 | -         | -         | DNAJC17              | <i>dnj-22</i> , Molecular chaperone (DnaJ superfamily)                                                                      |
| F52B5.1       | 3/4 | -         | -         | SLC4A9               | <i>abts-1</i> , Na <sup>+</sup> -independent Cl/HCO <sub>3</sub> exchanger AE1 and related transporters                     |
| F36H1.2       | 3/4 | -         | -         | NKPD1                | <i>tag-144</i> , Integral membrane ankyrin-repeat protein Kidins220 (protein kinase D substrate)                            |
| F35G12.7      | 3/4 | -         | -         | CUTA                 |                                                                                                                             |
| F59A3.1       | 3/4 | -         | -         | CPM, CPD             | encodes one of two <i>C. elegans</i> carboxypeptidase D homologs                                                            |
| Y41D4A_3192.a | 3/4 | -         | -         | QRSL1                | targets Y41D4A.6, amidases                                                                                                  |
| K07C11.4      | 3/4 | -         | -         | several              | carboxylesterase and related proteins                                                                                       |
| T23B12.4      | 3/4 | -         | -         | NAA35                | Glucose-repressible protein and related proteins                                                                            |
| W03G11.1      | 3/4 | -         | -         | MARCO                | <i>col-181</i> , collagen                                                                                                   |
| T26A5.9       | 3/4 | -         | -         | DYNLL2/DYNLL1        | <i>dlc-1</i> , Dynein light chain type 1                                                                                    |
| T08G11.1      | 3/4 | -         | -         | VPS13A/B/C           | vacuolar protein sorting-associated protein                                                                                 |
| W06A7.3       | 3/4 | -         | -         | RTN4                 | <i>ret-1</i> , reticulon protein                                                                                            |
| F44A2.5       | 3/4 | -         | -         | KIAA0427-001         | MIF4G domain-containing protein                                                                                             |
| F36D4.5       | 3/4 | -         | -         | C1orf121             | uncharacterized conserved protein                                                                                           |
| T19A5.1       | 3/4 | -         | -         | TTC17                | uncharacterized conserved protein, contains TPR repeats                                                                     |
| F33H1.3       | 3/4 | decreased | -         | WBP11                | uncharacterised conserved low complexity protein                                                                            |
| C48B6.8       | 3/4 | -         | -         | BBS9                 | <i>bbs-9</i> , bardet beidl syndrome protein. Predicted coiled-coil domain.                                                 |

|                      |     |           |   |                |                                                                                                                                    |
|----------------------|-----|-----------|---|----------------|------------------------------------------------------------------------------------------------------------------------------------|
| <i>R09E12.7</i>      | 3/4 | -         | - | nematodes only | targets <i>R09E12.4</i> and <i>str-238</i> , 7TM receptor                                                                          |
| <i>F48G7.1</i>       | 3/4 | -         | - | nematodes only | <i>srj-37</i> , 7TM receptor                                                                                                       |
| <i>C45H4.15</i>      | 3/4 | -         | - | nematodes only | <i>str-255</i> , 7TM receptor                                                                                                      |
| <i>C45H4.6</i>       | 3/4 | -         | - | nematodes only | <i>srbc-18</i> , serpentine receptor class BC like                                                                                 |
| <i>C45H4.11</i>      | 3/4 | -         | - | nematodes only | <i>srbc-20</i> , serpentine receptor class BC like                                                                                 |
| <i>C45H4.12</i>      | 3/4 | -         | - | nematodes only | <i>str-52</i> , serpentine receptor                                                                                                |
| <i>C34C6.1</i>       | 3/4 | -         | - | nematodes only | <i>srg-15</i> , serpentine receptor class g.                                                                                       |
| <i>F32B6.1</i>       | 3/4 | -         | - | nematodes only | <i>nhr-4</i> , nuclear hormone receptor                                                                                            |
| <i>F44C8.11</i>      | 3/4 | -         | - | nematodes only | <i>nhr-96</i> , nuclear hormone receptor                                                                                           |
| <i>F36F12.6</i>      | 3/4 | -         | - | nematodes only | <i>clec-208</i> , c type lectin                                                                                                    |
| <i>C03A7.14</i>      | 3/4 | -         | - | nematodes only | <i>abu-8</i> , transmembrane protein with multiple cysteine-rich repeats; is induced by blockage of the UPR                        |
| <i>Y105C5A.d</i>     | 3/4 | -         | - | nematodes only | targets many <i>pqn</i> proteins; <i>pqn-90</i> , <i>pqn-78</i> , <i>pqn-91</i> , <i>pqn-76</i> , <i>pqn-79</i> and <i>abu-5</i> . |
| <i>Y105C5A.c</i>     | 3/4 | -         | - | nematodes only | targets many genes including <i>pqn-76</i> , <i>pqn-79</i> , <i>abu-5</i> (activated in unfolded protein response)                 |
| <i>T01H10.5</i>      | 3/4 | -         | - | nematodes only | <i>lgc-16</i> , ligand gated ion channel acetylcholine receptor                                                                    |
| <i>F59F3.2</i>       | 3/4 | -         | - | nematodes only | <i>col-177</i> , collagen                                                                                                          |
| <i>ZC47.13</i>       | 3/4 | -         | - | nematodes only | <i>fbxa-50</i> , contains an F-box, predicted to mediate protein-protein interactions                                              |
| <i>Y49F6C.3</i>      | 3/4 | -         | - | nematodes only | <i>bath-9</i> , Uncharacterized protein, contains BTB/POZ domain                                                                   |
| <i>F23F12.4</i>      | 3/4 | -         | - | nematodes only | <i>sdz-15</i> , <i>skn-1</i> dependent zygotic transcript. Contains an F box                                                       |
| <i>F22F7.3</i>       | 3/4 | -         | - | nematodes only | extracellular protein with conserved cysteines                                                                                     |
| <i>R11G11.6</i>      | 3/4 | -         | - | nematodes only | predicted alpha-helical protein                                                                                                    |
| <i>F09F7.5</i>       | 3/4 | -         | - | nematodes only | encodes 3 isoforms of an unfamiliar protein required for brood size, growth, and for normally short lifespan                       |
| <i>M7.10</i>         | 3/4 | decreased | - | nematodes only | predicted alpha helical protein                                                                                                    |
| <i>C29F9.1</i>       | 3/4 | -         | - | nematodes only | uncharacterised protein                                                                                                            |
| <i>Y57G11B.1</i>     | 3/4 | -         | - | nematodes only | uncharacterised protein                                                                                                            |
| <i>Y105C5A.m</i>     | 3/4 | -         | - | nematodes only | targets <i>Y105C5A.14</i> , and <i>W05H12.2</i>                                                                                    |
| <i>T28D9.1</i>       | 3/4 | -         | - | nematodes only |                                                                                                                                    |
| <i>F44G4.7</i>       | 3/4 | -         | - | nematodes only |                                                                                                                                    |
| <i>M176.8</i>        | 3/4 | -         | - | nematodes only |                                                                                                                                    |
| <i>M01G12.6</i>      | 3/4 | -         | - | nematodes only |                                                                                                                                    |
| <i>T21E8.5</i>       | 3/4 | -         | - | nematodes only |                                                                                                                                    |
| <i>F54B8.1</i>       | 3/4 | decreased | - | nematodes only |                                                                                                                                    |
| <i>F45F2.11</i>      | 3/4 | -         | - | nematodes only |                                                                                                                                    |
| <i>Y105C5A.i</i>     | 3/4 | -         | - |                | targets <i>Y105C5A.10</i> , predicted transposase                                                                                  |
| <i>Y69H2.4</i>       | 3/4 | -         | - |                | superseded gene name                                                                                                               |
| <i>T16A9.1</i>       | 3/4 | -         | - |                | transposon                                                                                                                         |
| <i>C06B8.5</i>       | 3/4 | -         | - |                | transposon                                                                                                                         |
| <i>R09E12.6</i>      | 3/4 | -         | - |                | transposon                                                                                                                         |
| <i>Y82E9BR.22</i>    | 3/4 | -         | - |                |                                                                                                                                    |
| <i>Y55F3A_747.a</i>  | 3/4 | -         | - |                | targets <i>Y55F3BR.10</i>                                                                                                          |
| <i>Y69A2A_7278.m</i> | 3/4 | -         | - |                | no RNAi targets identified                                                                                                         |
| <i>Y69A2A_7278.d</i> | 3/4 | -         | - |                | target <i>Y69A2AR.27</i>                                                                                                           |
| <i>Y53C10A.10</i>    | 3/4 | decreased | - |                |                                                                                                                                    |



|               |     |           |           |                      |                                                                                                                   |
|---------------|-----|-----------|-----------|----------------------|-------------------------------------------------------------------------------------------------------------------|
| Y25C1A.6      | 3/4 | -         | decreased |                      |                                                                                                                   |
| C05B10.2      | 3/4 | -         | -         |                      | merged into R13H7.2                                                                                               |
| Y39C12A.h     | 3/4 | -         | -         |                      | Y39C12A.9                                                                                                         |
| Y51H4A.b      | 3/4 | decreased | -         |                      | targets Y51H4A.2                                                                                                  |
| F55C7.2       | 3/4 | -         | -         |                      |                                                                                                                   |
| F52D10.2      | 2/4 | -         | -         | FAM43A/B             | uncharacterized conserved protein, contains phosphotyrosine interaction (PI) domain                               |
| H09G03.2      | 2/4 | -         | -         | FRMPD3               | <i>frm-8</i> , FERM domain protein                                                                                |
| M01A10.1      | 2/4 | -         | -         | KHSRP, FUBP1/3       | predicted to regulate gene expression through binding mRNA or ssDNA                                               |
| F21D5.2       | 2/4 | -         | -         | OTUD6B               | OUT (ovarian tumour-like) cysteine protease                                                                       |
| D2085.2       | 2/4 | -         | -         | ATG10                | <i>atg-10</i> , yeast atg homolog. Uncharacterised conserved protein.                                             |
| C05D11.12     | 2/4 | -         | -         | ETFDH                | <i>let-721</i> , Electron transfer flavoprotein ubiquinone oxidoreductase                                         |
| B0403.4       | 2/4 | -         | -         | PDAI6                | <i>tag-320</i> , Thioredoxin/protein disulfide isomerase                                                          |
| ZK520.3       | 2/4 | -         | -         | WDR19                | <i>dyf-2</i> , expression is regulated by DAF-19; <i>dyf-2</i> mutants are longer-lived and heat-stress resistant |
| C47E8.4       | 2/4 | -         | -         | FAM50A/50B           | encodes a conserved protein that is a member of the FAM50A/XAP5 family                                            |
| F25G6.6       | 2/4 | -         | -         | NARS2                | <i>nars-2</i> , Asparagine synthase (glutamine-hydrolyzing)                                                       |
| ZC395.6       | 2/4 | -         | -         | TRIT1                | <i>gro-1</i> , tRNA delta(2)-isopentenylpyrophosphate transferase                                                 |
| C41C4.8       | 2/4 | -         | -         | VCP                  | <i>cdc-48.2</i> , AAA+ type ATPase                                                                                |
| C25A1.5       | 2/4 | -         | decreased | FA2H,                | cytochrome B5, sphingolipid fatty acid hydroxylase                                                                |
| F01G10.3      | 2/4 | -         | -         | EHHADH               | <i>ech-9</i> , Hydroxyacyl-CoA dehydrogenase/enoyl-CoA hydratase                                                  |
| ZK973.g       | 2/4 | -         | -         | SYNE1                | <i>anc-1</i> , abnormal nuclear anchorage                                                                         |
| ZK593.8       | 2/4 | -         | -         | FICD                 | Huntingtin interacting protein HYPE                                                                               |
| K12F2.1       | 2/4 | -         | -         | MYH1/2/3/8/13/15     | <i>myo-3</i> , Myosin class II heavy chain                                                                        |
| F46C5.9       | 2/4 | -         | -         | TBL2                 | WD40 repeat protein                                                                                               |
| Y51H7C_255.g  | 2/4 | -         | decreased | COG4                 | <i>cogc-4</i> , Golgi transport complex COD1 protein                                                              |
| T24B8.7       | 2/4 | -         | -         | USP18/41/48/24/9X/9Y |                                                                                                                   |
| F35H10.6      | 2/4 | -         | -         | UXT                  |                                                                                                                   |
| Y69H2.13      | 2/4 | -         | -         | VWDE                 | <i>tag-336</i>                                                                                                    |
| F41C6.5       | 2/4 | -         | -         | MARCO                | <i>col-173</i> , collagen                                                                                         |
| F08D12.14     | 2/4 | -         | -         | ESRRA, ESR1          | merged into K12H6.1, <i>nhr-119</i> nuclear hormone receptor                                                      |
| T09F5.1       | 2/4 | -         | -         | B3GALT1              | galactosyltransferases                                                                                            |
| F23C8.7       | 2/4 | -         | -         | nematodes only       | protein tyrosine kinase                                                                                           |
| Y53F4C.f      | 2/4 | -         | -         | nematodes only       | targets Y53F4B.25 (fibronectin), Y53F4B.8 and several 21U-RNAs                                                    |
| F58H7.8       | 2/4 | -         | -         | nematodes only       | <i>fbxc-3</i> , F-box domain                                                                                      |
| F23F12.3      | 2/4 | -         | -         | nematodes only       | Synaptic vesicle transporter SVOP and related transporters (major facilitator superfamily)                        |
| F48C1.7       | 2/4 | -         | -         | nematodes only       | <i>spe-11</i> , defective spermatogenesis                                                                         |
| Y71G12A_201.b | 2/4 | -         | -         | nematodes only       | <i>lin-65</i> , required for fertility                                                                            |
| Y105C5A.j     | 2/4 | -         | -         | nematodes only       | targets <i>srg-19</i> and <i>srh-72</i> , serpentine receptors                                                    |
| T01G6.9       | 2/4 | -         | -         | nematodes only       | <i>str-256</i> , 7TM receptor                                                                                     |
| T20D3.1       | 2/4 | -         | -         | nematodes only       | <i>clcc-183</i> , c-type lectin                                                                                   |
| Y69A2A_2991.c | 2/4 | -         | -         | nematodes only       | targets Y69A2AR.19, protein tyrosine phosphatase contains WSN domain.                                             |
| F58G4.4       | 2/4 | -         | -         | nematodes only       | <i>sdz-23</i> , <i>skn-1</i> dependent zygotic transcript                                                         |
| C06E4.7       | 2/4 | -         | -         | nematodes only       | <i>glb-2</i> , globin related                                                                                     |

|                   |     |           |   |                     |                                                                                           |
|-------------------|-----|-----------|---|---------------------|-------------------------------------------------------------------------------------------|
| <i>C49A9.3</i>    | 2/4 | -         | - | nematodes only      | uncharacterised protein with ubiquitin fold                                               |
| <i>R05A10.6</i>   | 2/4 | -         | - | nematodes only      | extracellular protein with conserved cysteines                                            |
| <i>F36F12.1</i>   | 2/4 | -         | - | nematodes only      | extracellular protein with conserved cysteines                                            |
| <i>B0478.3</i>    | 2/4 | -         | - | nematodes only      |                                                                                           |
| <i>C38D4.1</i>    | 2/4 | -         | - | nematodes only      |                                                                                           |
| <i>K02E10.3</i>   | 2/4 | decreased | - | nematodes only      | targets K02E10.4                                                                          |
| <i>H23L24.b</i>   | 2/4 | -         | - | nematodes only      | targets H23L24.4                                                                          |
| <i>T27E7.3</i>    | 2/4 | -         | - | nematodes only      |                                                                                           |
| <i>F55B11.3</i>   | 2/4 | -         | - | nematodes only      |                                                                                           |
| <i>Y57G11C.8</i>  | 2/4 | -         | - | nematodes only      |                                                                                           |
| <i>C35D10.8</i>   | 2/4 | decreased | - | nematodes only      |                                                                                           |
| <i>Y26D4A.8</i>   | 2/4 | -         | - | nematodes only      |                                                                                           |
| <i>C39H7.4</i>    | 2/4 | -         | - | nematodes only      |                                                                                           |
| <i>T05A12.3</i>   | 2/4 | -         | - | nematodes only      |                                                                                           |
| <i>C03B1.2</i>    | 2/4 | -         | - | nematodes only      |                                                                                           |
| <i>F20C5.6</i>    | 2/4 | -         | - | nematodes only      |                                                                                           |
| <i>F38E11.6</i>   | 2/4 | -         | - | nematodes only      |                                                                                           |
| <i>F55B11.4</i>   | 2/4 | -         | - | nematodes only      |                                                                                           |
| <i>Y57G11A.5</i>  | 2/4 | -         | - | nematodes only      |                                                                                           |
| <i>F13E9.9</i>    | 2/4 | -         | - | nematodes only      |                                                                                           |
| <i>T27E7.1</i>    | 2/4 | -         | - | nematodes only      |                                                                                           |
| <i>H12I19.3</i>   | 2/4 | -         | - |                     | <i>srz-30</i> , serpentine receptor class Z                                               |
| <i>T27E7.2</i>    | 2/4 | -         | - |                     | <i>srh-65</i> , serpentine receptor class h                                               |
| <i>Y57G11C.27</i> | 2/4 | -         | - |                     | <i>srt-51</i> , serpentine receptor class t                                               |
| <i>B0413.2</i>    | 2/4 | -         | - |                     | targets <i>tsp-13</i> , Tetraspanin family integral membrane protein                      |
| <i>Y57G11A.3</i>  | 2/4 | -         | - |                     | <i>tag-273</i>                                                                            |
| <i>ZK262.5</i>    | 2/4 | -         | - |                     | transposon                                                                                |
| <i>C02F4.3</i>    | 2/4 | -         | - |                     |                                                                                           |
| <i>K08D8.1</i>    | 2/4 | -         | - |                     |                                                                                           |
| <i>Y41E3.5</i>    | 2/4 | -         | - |                     |                                                                                           |
| <i>R12B2.6</i>    | 2/4 | -         | - |                     |                                                                                           |
| <i>F21F8.6</i>    | 2/4 | -         | - |                     |                                                                                           |
| <i>F14H3.6</i>    | 2/4 | -         | - |                     |                                                                                           |
| <i>R03G8.3</i>    | 2/4 | -         | - |                     |                                                                                           |
| <i>ZK643.3</i>    | 1/4 | -         | - | CRHR2/1,            | adenylate cyclase-coupled calcitonin receptor also orthologous to PTH2R/1R, CALCR, CALCRL |
| <i>C01B10.3</i>   | 1/4 | -         | - | INPP5A              | inositol polyphosphate 5 phosphatase, type I                                              |
| <i>F01D4.3</i>    | 1/4 | -         | - | FER                 | tyrosine kinase                                                                           |
| <i>Y105C5A.x</i>  | 1/4 | -         | - | MOS, MAP3K7         | targets Y105C5A.24, tyrosine kinase and several 21URNA                                    |
| <i>F38E1.7</i>    | 1/4 | -         | - | WNT10A/9A/9B/10B    | <i>mom-2</i> , wnt family of developmental regulators                                     |
| <i>F47D12.4</i>   | 1/4 | -         | - | HMG1/2/3/4          | <i>hmg-1.2</i> , HMG box-containing                                                       |
| <i>ZC168.3</i>    | 1/4 | -         | - | ORC5                | origin recognition complex, subunit 5                                                     |
| <i>ZK593.4</i>    | 1/4 | -         | - | KDM5A/B/C/D, JARID2 | <i>rbr-2</i> , retinoblastoma binding related. Histone H3 lysine 4                        |
| <i>Y57G11C.25</i> | 1/4 | -         | - | ZFP36L2/1, ZFP36    | <i>ccch-5</i> , CCCH-type Zn-finger protein transcription factor                          |

|               |     |   |           |                              |                                                                                                                         |
|---------------|-----|---|-----------|------------------------------|-------------------------------------------------------------------------------------------------------------------------|
| C50F4.7       | 1/4 | - | -         | HIST1H4G/4H/4K/4A/4F         | <i>his-37</i> , H4 histone                                                                                              |
| C34C6.8       | 1/4 | - | -         | VENTX                        | <i>ceh-7</i> , homeodomain transcription factor                                                                         |
| F08D12.1      | 1/4 | - | -         | SRP72                        | signal recognition particle homolog                                                                                     |
| H06H21.3      | 1/4 | - | decreased | EIF1AX, EIF1AY               | translation initiation factor                                                                                           |
| F37B1.1       | 1/4 | - | -         | GSTA1/2/3/4/5                | <i>gst-24</i> , glutathione-S-transferase                                                                               |
| C02D5.3       | 1/4 | - | -         | GSTO2/1                      | <i>gsto-2</i> , glutathione S transferase                                                                               |
| Y37A1C.1      | 1/4 | - | -         | SLC12A1/2/3                  | <i>nkcc-1</i> , Na-K-Cl cotransporter                                                                                   |
| C26H9A.1      | 1/4 | - | -         | ATP6V0A4/1/2, TCIRG1         | <i>vha-7</i> , vacuolar H ATPase                                                                                        |
| T08G11.4      | 1/4 | - | -         | TGS1                         | methylase, negatively regulates <i>gpdh-1</i>                                                                           |
| K12H6.3       | 1/4 | - | -         | FUT3/4/5/6/7/9               | <i>fut-4</i> , fucosyl transferase                                                                                      |
| F49E12.9      | 1/4 | - | -         | C5orf4                       | C-4 sterol methyl oxidase                                                                                               |
| T09F3.3       | 1/4 | - | -         | GAPDHS, GAPDH                | <i>gpd-1</i> , glyceraldehyde 3-dehydrogenase                                                                           |
| Y46G5.kk      | 1/4 | - | -         | GYS1, GYS2                   | <i>gsy-1</i> , glycogen synthase 1                                                                                      |
| ZK688.3       | 1/4 | - | -         | FAHD2A/B, FAHD1              | predicted fumarylacetoacetate hydrolase                                                                                 |
| H04M03.1      | 1/4 | - | -         | PCK1/2                       | phosphoenolpyruvate carboxykinase                                                                                       |
| Y67D8A_369.a  | 1/4 | - | -         | PHKB                         | Y67D8A.1, phosphorylase kinase, and Y67D8A.9                                                                            |
| JC8.4         | 1/4 | - | -         | ADAT2                        | cytosine deaminase                                                                                                      |
| Y76B12C_67.c  | 1/4 | - | -         | OSBPL6, RP4-604K5.1,         | Y76B12C.3, selenoprotein , also homologous to ATP1B1                                                                    |
| Y40B10A.g     | 1/4 | - | decreased | COMTD1                       | Y40B10A.2, O-methyltransferase                                                                                          |
| R05H10.2      | 1/4 | - | decreased | RBM28                        | <i>rbm-28</i> , nucleolar protein fibrillarin NOP77                                                                     |
| R07G3.3       | 1/4 | - | decreased | TPR                          | <i>npp-1</i> , nuclear pore complex, p54 component                                                                      |
| ZK973.i       | 1/4 | - | -         | SYNE2, SYNE1, CLMN           | targets <i>anc-1</i> , which affects positioning of nuclei and mitochondria within the cytoskeleton, and other genes... |
| D2024.6       | 1/4 | - | -         | CAPZA2                       | <i>cap-1</i> , F-actin capping protein                                                                                  |
| F08B4.1       | 1/4 | - | -         | SAGE1, CT45A1, INTS6, DDX26B | <i>dic-1</i> , essential for normal mitochondria morphology and function                                                |
| Y53C12A.4     | 1/4 | - | -         | CAB39L                       | <i>mop-25.2</i> , negatively regulates dynein                                                                           |
| B0336.9       | 1/4 | - | -         | SFSWAP                       | <i>swp-1</i> , mRNA binding factor                                                                                      |
| R07E5.14      | 1/4 | - | -         | RBM8A                        | <i>rnp-4</i> , RNA binding protein, putative member of exon-exon junction complex                                       |
| C17E4.5       | 1/4 | - | -         | PABPN1L                      | <i>pabp-2</i> , polyA binding protein, splicing factor                                                                  |
| C44E4.4       | 1/4 | - | -         | SSB                          | RNA binding La                                                                                                          |
| Y71G12A_201.a | 1/4 | - | -         | DDX27                        | targets Y71G12B.8, DEAD box helicase, and Y71G12B.25                                                                    |
| W07E6.1       | 1/4 | - | -         | NOP2                         | <i>nol-1</i> , tRNA and rRNA cytosine-C5-methylase (nucleolar protein NOL1/NOP2)                                        |
| C06G3.10      | 1/4 | - | -         | COG2                         | <i>cogc-2</i> , low density lipoprotein receptor                                                                        |
| Y48B6A.4      | 1/4 | - | decreased | CHRFAM7A, CHRNA7             | <i>eat-2</i> , acetylcholine receptor                                                                                   |
| C01F6.7       | 1/4 | - | -         | SLC9A3R1                     | <i>tag-60</i> , acetylcholine transmission                                                                              |
| Y39B6B.a      | 1/4 | - | -         | SDAD1                        | <i>pro-3</i> , proximal proliferation in germline                                                                       |
| Y49A3A.3      | 1/4 | - | -         | CCDC76                       | uncharacterised conserved protein                                                                                       |
| R12B2.2       | 1/4 | - | -         | BLZF1                        |                                                                                                                         |
| F37C12.1      | 1/4 | - | -         | CCDC94                       | uncharacterized conserved protein                                                                                       |
| C16C10.6      | 1/4 | - | -         | CCDC55                       | <i>ccdc-55</i> , uncharacterised conserved protein                                                                      |
| D2085.5       | 1/4 | - | decreased | RALGAPB                      | uncharacterised conserved protein, short lifespan, age associated fluorescence increased                                |
| W09H1.3       | 1/4 | - | decreased | C3orf33                      | uncharacterised conserved protein                                                                                       |
| F46C8.6       | 1/4 | - | -         | COL17A1                      | <i>dpy-7</i> , collagen                                                                                                 |

|                  |     |   |           |                |                                                                                                     |
|------------------|-----|---|-----------|----------------|-----------------------------------------------------------------------------------------------------|
| <i>M153.2</i>    | 1/4 | - | -         | MFSD11         | uncharacterised conserved protein                                                                   |
| <i>R148.1</i>    | 1/4 | - | -         | nematodes only | <i>mks-1 / xbx-7</i>                                                                                |
| <i>F41D3.4</i>   | 1/4 | - | -         | nematodes only | <i>oac-27</i> , integral membrane O-acetyltransferase                                               |
| <i>T06C10.2</i>  | 1/4 | - | -         | nematodes only | <i>srt-73</i> , serpentine receptor class T                                                         |
| <i>T12A2.13</i>  | 1/4 | - | -         | nematodes only | <i>srg-6</i> , serpentine receptor class G                                                          |
| <i>F10A3.13</i>  | 1/4 | - | -         | nematodes only | <i>str-108</i> , serpentine receptor                                                                |
| <i>F54B8.10</i>  | 1/4 | - | -         | nematodes only | <i>srbc-52</i> , serpentine receptor, class BC                                                      |
| <i>K03D3.4</i>   | 1/4 | - | -         | nematodes only | <i>srz-61</i> , serpentine receptor class Z                                                         |
| <i>C35D6.2</i>   | 1/4 | - | -         | nematodes only | <i>srh-227</i> , serpentine receptor class H                                                        |
| <i>F48G7.12</i>  | 1/4 | - | -         | nematodes only | predicted small molecule kinase                                                                     |
| <i>F20D6.5</i>   | 1/4 | - | -         | nematodes only | predicted small molecule kinase                                                                     |
| <i>H24O09.b</i>  | 1/4 | - | decreased | nematodes only | <i>fbxb-72</i> , F box B protein, predicted transposase                                             |
| <i>W02D7.6</i>   | 1/4 | - | -         | nematodes only | C2H2-type Zn-finger                                                                                 |
| <i>R09B5.3</i>   | 1/4 | - | -         | nematodes only | <i>cnc-2</i> , caenacin, secreted antimicrobial peptide regulated by TGFbeta pathway                |
| <i>T06C12.7</i>  | 1/4 | - | -         | nematodes only | <i>nhr-84</i> , nuclear hormone receptor                                                            |
| <i>K06B4.12</i>  | 1/4 | - | -         | nematodes only | <i>twk-34</i> , tandem pore domain K+ channel                                                       |
| <i>C06E7.6</i>   | 1/4 | - | -         | nematodes only | <i>spe-27</i> , required for hermaphrodite sperm activation                                         |
| <i>F45C12.11</i> | 1/4 | - | -         | nematodes only | <i>sdz-18</i> , skn-1 dependent zygotic transcript, uncharacterised protein contains BTB/POZ domain |
| <i>K02F6.3</i>   | 1/4 | - | decreased | nematodes only | WSN domain                                                                                          |
| <i>C55A1.6</i>   | 1/4 | - | -         | nematodes only | uncharacterised protein                                                                             |
| <i>T04D1.2</i>   | 1/4 | - | -         | nematodes only | protein containing an F-box                                                                         |
| <i>Y53F4B.r</i>  | 1/4 | - | -         | nematodes only | Y53F4B.14, uncharacterised protein                                                                  |
| <i>F41E6.8</i>   | 1/4 | - | -         | nematodes only | uncharacterised protein                                                                             |
| <i>C25E10.8</i>  | 1/4 | - | -         | nematodes only | uncharacterised protein                                                                             |
| <i>F36G9.13</i>  | 1/4 | - | -         | nematodes only | WSN domain                                                                                          |
| <i>LLC1.2</i>    | 1/4 | - | -         | nematodes only | uncharacterised protein                                                                             |
| <i>Y73F8A.r</i>  | 1/4 | - | -         | nematodes only | targets ZK1248.7                                                                                    |
| <i>C35D6.3</i>   | 1/4 | - | -         | nematodes only |                                                                                                     |
| <i>F27C8.5</i>   | 1/4 | - | -         | nematodes only |                                                                                                     |
| <i>C28D4.5</i>   | 1/4 | - | -         | nematodes only | uncharacterised protein                                                                             |
| <i>F01G10.5</i>  | 1/4 | - | -         | nematodes only |                                                                                                     |
| <i>Y65A5A.3</i>  | 1/4 | - | -         | nematodes only |                                                                                                     |
| <i>F52E1.5</i>   | 1/4 | - | -         | nematodes only |                                                                                                     |
| <i>K06B4.3</i>   | 1/4 | - | -         | nematodes only |                                                                                                     |
| <i>C33A12.4</i>  | 1/4 | - | -         | nematodes only |                                                                                                     |
| <i>C31H1.2</i>   | 1/4 | - | -         | nematodes only |                                                                                                     |
| <i>C06E7.4</i>   | 1/4 | - | -         | nematodes only |                                                                                                     |
| <i>B0244.7</i>   | 1/4 | - | -         | nematodes only |                                                                                                     |
| <i>K06H7.1</i>   | 1/4 | - | -         | nematodes only |                                                                                                     |
| <i>ZC395.5</i>   | 1/4 | - | -         | nematodes only |                                                                                                     |
| <i>C09F5.1</i>   | 1/4 | - | -         | nematodes only |                                                                                                     |
| <i>T21B10.4</i>  | 1/4 | - | -         | nematodes only |                                                                                                     |
| <i>Y9C2UA.1</i>  | 1/4 | - | -         | nematodes only |                                                                                                     |

|                      |     |           |           |                                                   |
|----------------------|-----|-----------|-----------|---------------------------------------------------|
| <i>T03D8.5</i>       | 1/4 | -         | -         | <i>gcy-22</i> , guanylyl cyclase                  |
| <i>Y53F4C.g</i>      | 1/4 | -         | decreased | <i>Y53F4B.26</i> , DNA helicase                   |
| <i>B0546.4</i>       | 1/4 | -         | -         | predicted Yippee-type zinc-binding protein        |
| <i>F42A9.4</i>       | 1/4 | -         | -         | <i>cyp-33E3</i> , cytochrome p450 superfamily     |
| <i>Y119D3_463.d</i>  | 1/4 | -         | -         | <i>cnc-6</i> , caenecin peptides                  |
| <i>Y59E9_120.d</i>   | 1/4 | -         | -         | <i>thn-7</i> and <i>thn-5</i> , thaumatin family  |
| <i>K03D3.3</i>       | 1/4 | -         | -         | <i>srz-21</i> , serpentine receptor class Z       |
| <i>Y7A9C.3</i>       | 1/4 | -         | -         | <i>srz-73</i> , serpentine receptor class Z       |
| <i>F14E5.1</i>       | 1/4 | -         | -         | permease of the major facilitator superfamily     |
| <i>F41A4.1</i>       | 1/4 | -         | -         | <i>cutl-28</i> , cuticlin-like                    |
| <i>Y73B6A.e</i>      | 1/4 | -         | -         | 21ur-12285 (21U-RNA)                              |
| <i>Y105C5A.I</i>     | 1/4 | -         | -         | targets C08E3.13, C08E3.1, Y105C5A.12, Y105C5A.13 |
| <i>H25K10.2</i>      | 1/4 | -         | -         |                                                   |
| <i>K03D3.9</i>       | 1/4 | -         | -         | superseded or retired gene name                   |
| <i>C33A12.5</i>      | 1/4 | -         | -         | transposon                                        |
| <i>C02F4.5</i>       | 1/4 | -         | -         |                                                   |
| <i>T19C3.6</i>       | 1/4 | -         | -         |                                                   |
| <i>F19B10.6</i>      | 1/4 | -         | -         |                                                   |
| <i>F07H5.4</i>       | 1/4 | -         | -         |                                                   |
| <i>C35D6.5</i>       | 1/4 | -         | -         |                                                   |
| <i>Y67D8A_349.a</i>  | 1/4 | -         | -         | no RNAi details                                   |
| <i>Y38F2A_9208.a</i> | 1/4 | -         | -         | no targets identified                             |
| <i>Y67D8A_375.b</i>  | 1/4 | -         | -         | no targets identified                             |
| <i>Y53F4B.v</i>      | 1/4 | -         | decreased | no targets identified                             |
| <i>F48E3.8</i>       | 1/4 | -         | -         |                                                   |
| <i>F38E1.11</i>      | 1/4 | -         | -         |                                                   |
| <i>T23F2.2</i>       | 1/4 | decreased | -         |                                                   |
| <i>F41C6.3</i>       | 1/4 | -         | -         |                                                   |

**Table S4. Overlap between genes that are required for expression of *gcs-1p::gfp* in the *prdx-2* mutant (Table S3) and those identified by published RNAi screens of the same RNAi library for different phenotypes.** Table shows overlap of genes required for *gcs-1p::gfp* expression in the *prdx-2* mutant in at least 2 out of 4 trials. Comparisons between our gene set and those identified by other screens (by calculation of the cumulative hypergeometric probabilities of genes being identified in each screen by chance) indicates that there is significant overlap between the genes identified by our screen and (i) genes required for resistance to ionising radiation ( $p=0.0039$ ) and (ii) genes required for the long lifespan of the *daf-2* mutant ( $p=0.0008$ ). In contrast the representation of genes identified by our screen amongst those identified by the other screens is likely to have occurred by chance ( $P>0.1$ ).

| Screen                                          | No. of genes | overlapping genes | Representation Factor | Hypergeometric probability (P) |
|-------------------------------------------------|--------------|-------------------|-----------------------|--------------------------------|
| Fat reduction <sup>1</sup>                      | 305          | 6                 | 1.37                  | 0.27                           |
| Fat accumulation <sup>1</sup>                   | 111          | 3                 | 1.88                  | 0.21                           |
| Protein aggregation <sup>2</sup>                | 186          | 1                 | 0.37                  | 0.93                           |
| Increase in lifespan <sup>3</sup>               | 95           | 3                 | 2.2                   | 0.156                          |
| Increase in lifespan <sup>4</sup>               | 29           | 1                 | 2.4                   | 0.34                           |
| Tau aggregation <sup>5</sup>                    | 75           | 1                 | 0.93                  | 0.66                           |
| Ionising radiation sensitivity <sup>6</sup>     | 45           | 4                 | 6.18                  | 0.0039 (**)                    |
| Reduction of <i>daf-2</i> lifespan <sup>7</sup> | 106          | 7                 | 4.6                   | 0.0008 (***)                   |
| Hypertonic stress sensitivity <sup>8</sup>      | 34           | 1                 | 2.05                  | 0.39                           |
| <i>Pgpdh-1</i> suppression <sup>9</sup>         | 253          | 4                 | 1.1                   | 0.49                           |
| Osmotic sensitivity <sup>9</sup>                | 84           | 1                 | 0.83                  | 0.7                            |
| PFT sensitivity <sup>10</sup>                   | 106          | 3                 | 1.97                  | 0.19                           |

<sup>1</sup>Ashrafi K, Chang FY, Watts JL, Fraser AG, Kamath RS, et al. (2003) Genome-wide RNAi analysis of *Caenorhabditis elegans* fat regulatory genes. *Nature* 421: 268-272. <sup>2</sup>Nollen EA, Garcia SM, van Haaften G, Kim S, Chavez A, et al. (2004) Genome-wide RNA interference screen identifies previously undescribed regulators of polyglutamine aggregation. *Proc Natl Acad Sci U S A* 101: 6403-6408. <sup>3</sup>Hamilton B, Dong Y, Shindo M, Liu W, Odell I, et al. (2005) A systematic RNAi screen for longevity genes in *C. elegans*. *Genes Dev* 19: 1544-1555. <sup>4</sup>Hansen M, Hsu AL, Dillin A, Kenyon C (2005) New genes tied to endocrine, metabolic, and dietary regulation of lifespan from a *Caenorhabditis elegans* genomic RNAi screen. *PLoS Genet* 1: 119-128. <sup>5</sup>Kraemer BC, Burgess JK, Chen JH, Thomas JH, Schellenberg GD (2006) Molecular pathways that influence human tau-induced pathology in *Caenorhabditis elegans*. *Hum Mol Genet* 15: 1483-1496. <sup>6</sup>van Haaften G, Romeijn R, Pothof J, Koole W, Mullenders LH, et al. (2006) Identification of conserved pathways of DNA-damage response and radiation protection by genome-wide RNAi. *Curr Biol* 16: 1344-1350. <sup>7</sup>Samuelson AV, Carr CE, Ruvkun G (2007) Gene activities that mediate increased life span of *C. elegans* insulin-like signaling mutants. *Genes Dev* 21: 2976-2994. <sup>8</sup>Choe KP, Strange K (2008) Genome-wide RNAi screen and in vivo protein aggregation reporters identify degradation of damaged proteins as an essential hypertonic stress response. *Am J Physiol Cell Physiol* 295: C1488-1498. <sup>9</sup>Rohlfing AK, Miteva Y, Moronetti L, He L, Lamitina T (2011) The *Caenorhabditis elegans* mucin-like protein OSM-8 negatively regulates osmosensitive physiology via the transmembrane protein PTR-23. *PLoS Genet* 7: e1001267. <sup>10</sup>Kao CY, Los FC, Huffman DL, Wachi S, Kloft N, et al. (2011) Global functional analyses of cellular responses to pore-forming toxins. *PLoS Pathog* 7: e1001314.

**Table S5. RNAi clones which prevented arsenite-induced intestinal *gcs-1p::gfp* expression in wild-type animals.** 53 of the 90 RNAi clones that reduced intestinal *gcs-1p::gfp* expression in *prdx-2* mutant animals under normal growth conditions on each of 4 occasions (Table S3) also prevented an increase in intestinal *gcs-1p::gfp* expression in wild-type (N2 *gcs-1p::gfp*) animals treated for 90 minutes with 1mM arsenite. Clones are listed according to the number of times they prevented an increase in intestinal *gcs-1p::gfp* expression out of the 3 times in which they were screened. Each RNAi clone caused intestinal *gcs-1p::gfp* to remain undetectable levels in at least 50% of the RNAi-treated animals. Gene descriptions were derived from WormBase.

| RNAi clone       | No of occasions on which clone reduced intestinal <i>gcs-1p::gfp</i> expression in arsenite-treated wild-type animals | Gene description                                                                                 |
|------------------|-----------------------------------------------------------------------------------------------------------------------|--------------------------------------------------------------------------------------------------|
| <i>F54C1.3</i>   | 3/3                                                                                                                   | <i>mes-3</i> , member of polycomb-like chromatin repressive complex                              |
| <i>B0025.2</i>   | 3/3                                                                                                                   | <i>csn-2</i> , COP9 signalosome subunit CSN2                                                     |
| <i>R11A5.1</i>   | 3/3                                                                                                                   | <i>apb-3</i> , adaptin predicted to be involved in formation of intracellular transport vesicles |
| <i>C17G10.1</i>  | 3/3                                                                                                                   | predicted component of NuA3 histone acetyltransferase complex                                    |
| <i>C34F11.3</i>  | 3/3                                                                                                                   | adenosine monophosphate deaminase                                                                |
| <i>C26C6.1</i>   | 3/3                                                                                                                   | <i>pbrm-1</i> , human polybromo 1, chromatin remodelling complex                                 |
| <i>C06A8.1</i>   | 3/3                                                                                                                   | orthologous to human MSH HOMEBOX HOMOLOG 1 (MTHFR) mutated in homocystinuria                     |
| <i>T05H10.5</i>  | 3/3                                                                                                                   | <i>ufd-2</i> , ubiquitin fusion degradation protein-2                                            |
| <i>F13B10.1</i>  | 3/3                                                                                                                   | <i>tir-1</i> , toll and interleukin-1 receptor domain containing                                 |
| <i>C16A3.8</i>   | 3/3                                                                                                                   | THO complex (transcription factor/nuclear export factor) subunit                                 |
| <i>K04G7.12</i>  | 3/3                                                                                                                   | targets K04G7.11                                                                                 |
| <i>T28H11.2</i>  | 3/3                                                                                                                   | <i>srm-1</i> , serpentine receptor class M                                                       |
| <i>D2096.8</i>   | 3/3                                                                                                                   | nucleosome assembly protein NAP-1                                                                |
| <i>C35C5.1</i>   | 3/3                                                                                                                   | <i>sdc-2</i> , represses transcription of X chromosomes to achieve dosage compensation           |
| <i>F46E10.11</i> | 3/3                                                                                                                   | fibrillins and related proteins containing Ca <sup>2+</sup> binding EGF-like domains             |
| <i>F47A4.2</i>   | 3/3                                                                                                                   | <i>dpy-22</i> , homologous to human transcriptional mediator protein TRAP230, also called mdt-12 |
| <i>F22F7.4</i>   | 3/3                                                                                                                   | extracellular protein with conserved cysteines                                                   |
| <i>Y102A5A.1</i> | 3/3                                                                                                                   | <i>cand-1</i> , (CAND1 [cullin-associated NEDD8-dissociated protein 1] homolog)                  |
| <i>ZK792.3</i>   | 3/3                                                                                                                   | <i>inx-9</i> , innexin, an integral transmembrane channel protein                                |
| <i>C28H8.3</i>   | 2/3                                                                                                                   | predicted helicase, DEAD box superfamily                                                         |
| <i>T26A5.2</i>   | 2/3                                                                                                                   |                                                                                                  |
| <i>C44B9.2</i>   | 2/3                                                                                                                   |                                                                                                  |
| <i>Y111B2C.a</i> | 2/3                                                                                                                   | unfamiliar protein                                                                               |
| <i>E04F6.3</i>   | 2/3                                                                                                                   | <i>maoc-1</i> , peroxisomal multifunctional beta oxidation protein                               |
| <i>B0286.4</i>   | 2/3                                                                                                                   | <i>ntl-2</i> , NOT-like complex component, predicted transcriptional regulator                   |
| <i>T26A8.4</i>   | 2/3                                                                                                                   |                                                                                                  |
| <i>B0416.5</i>   | 2/3                                                                                                                   | permease of the major facilitator superfamily                                                    |
| <i>C45H4.1</i>   | 2/3                                                                                                                   | <i>srbc-16</i> , serpentine receptor class BC like                                               |

| RNAi clone      | No of occasions on which clone reduced intestinal <i>gcs-1p::gfp</i> expression in arsenite-treated wild-type animals | Gene description                                                                                                                                                                  |
|-----------------|-----------------------------------------------------------------------------------------------------------------------|-----------------------------------------------------------------------------------------------------------------------------------------------------------------------------------|
| <i>K04D7.1</i>  | 2/3                                                                                                                   | <i>rack-1</i> , G protein beta subunit-like protein                                                                                                                               |
| <i>M01G12.4</i> | 2/3                                                                                                                   | <i>srw-111</i> , serpentine receptor class W                                                                                                                                      |
| <i>T27B7.1</i>  | 2/3                                                                                                                   | <i>nhr-59</i> , nuclear hormone receptor                                                                                                                                          |
| <i>ZK617.1</i>  | 2/3                                                                                                                   | <i>unc-22</i> , twitchin, a giant intracellular protein with multiple fibronectin- and immunoglobulin-like domains and a single protein kinase domain that is homologous to titin |
| <i>K05D4.4</i>  | 1/3                                                                                                                   | <i>cyp-33D1</i> , cytochrome P450 CYP2 subfamily                                                                                                                                  |
| <i>F08B12.2</i> | 1/3                                                                                                                   | <i>prx-12</i> , Predicted E3 ubiquitin ligase involved in peroxisome organization                                                                                                 |
| <i>F21H12.4</i> | 1/3                                                                                                                   | <i>ptc-2</i> , membrane-protein patched / PTCH                                                                                                                                    |
| <i>C29E6.1</i>  | 1/3                                                                                                                   | <i>let-653</i> , mucin-like protein similar to the highly glycosylated mucins secreted by the apical surface of epithelia                                                         |
| <i>F32B6.3</i>  | 1/3                                                                                                                   | U5 snRNP-associated RNA splicing factor                                                                                                                                           |
| <i>W01B6.9</i>  | 1/3                                                                                                                   | <i>ndc-80</i> , centromere-associated protein HEC1                                                                                                                                |
| <i>D1046.1</i>  | 1/3                                                                                                                   | mRNA cleavage factor 1 subunit                                                                                                                                                    |
| <i>F41H10.7</i> | 1/3                                                                                                                   | <i>elo-5</i> , fatty acid elongation                                                                                                                                              |
| <i>T12D8.5</i>  | 1/3                                                                                                                   |                                                                                                                                                                                   |
| <i>F20H11.3</i> | 1/3                                                                                                                   | <i>mdh-1</i> , NAD dependent malate dehydrogenase                                                                                                                                 |
| <i>R12B2.1</i>  | 1/3                                                                                                                   | <i>sma-4</i> , TGFbeta receptor signalling protein                                                                                                                                |
| <i>R148.2</i>   | 1/3                                                                                                                   |                                                                                                                                                                                   |
| <i>K02F3.11</i> | 1/3                                                                                                                   | <i>mnp-5</i> , splicing factor                                                                                                                                                    |
| <i>F58B6.1</i>  | 1/3                                                                                                                   |                                                                                                                                                                                   |
| <i>R134.2</i>   | 1/3                                                                                                                   | <i>gcy-2</i> , guanylyl cyclase                                                                                                                                                   |
| <i>T18H9.1</i>  | 1/3                                                                                                                   | <i>grd-6</i> , GROUND domains (extracellular cysteine-containing domain sometimes associated with HOG domains)                                                                    |
| <i>F25B3.4</i>  | 1/3                                                                                                                   |                                                                                                                                                                                   |
| <i>R13H4.7</i>  | 1/3                                                                                                                   |                                                                                                                                                                                   |
| <i>F57F5.5</i>  | 1/3                                                                                                                   | <i>pkc-1</i> , protein kinase C                                                                                                                                                   |
| <i>C50E3.8</i>  | 1/3                                                                                                                   |                                                                                                                                                                                   |
| <i>F21F8.5</i>  | 1/3                                                                                                                   |                                                                                                                                                                                   |



**Table S6. Primer sequences used in quantitative pcr reactions.**

| primer    | sequence                    |
|-----------|-----------------------------|
| act-1 Fwd | 5'-TACCCAATTGAGCACGGTAT-3'  |
| act-1 Rev | 5'-TTAGCCTTTGGATTGAGTGG-3'  |
| gcs-1 Fwd | 5'-AATCGATTCCCTTTGGAGACC-3' |
| gcs-1 Rev | 5'-ATGTTGCCCTCGACAATGTT-3'  |
| gst-7 Fwd | 5'-GACAGCTTCCACTCCTTGAA-3'  |
| gst-7 Rev | 5'-GCACACTTTCCATTGATTCC-3'  |
| dhs-8 Fwd | 5'-CTGGAAGTGGAGTCAGAACT-3'  |
| dhs-8 Rev | 5'-CTGTAGTTGCTGCTCCTTGA-3'  |
| sdz-8 Fwd | 5'-CTCTTGCTGTTGACTTGAAGG-3' |
| sdz-8 Rev | 5'-TTGTTCAACCGTGAGTGCTG-3'  |
| gst-4 Fwd | 5'-AACGACTCCATTTGCCAGC-3'   |
| gst-4 Rev | 5'-CAGTTTTTCCAGCGAGTCCA-3'  |
